# Supplementary material
Source: publisher figshare collection journal article supplement (https://acs.figshare.com/ndownloader/files/7590460)
Supplement: Supplementary file 1 [file 7590460]

data_AB
_audit_creation_method         'generated by CrystalMaker 2.6.3'
_cell_length_a                   9.6000(0)
_cell_length_b                   9.6000(0)
_cell_length_c                   6.8000(0)
_cell_angle_alpha               90.0000(0)
_cell_angle_beta                90.0000(0)
_cell_angle_gamma              120.0000(0)

_symmetry_space_group_name_H-M     'P 1'
_symmetry_Int_Tables_number         1
_symmetry_cell_setting             triclinic
loop_
_symmetry_equiv_pos_as_xyz
'+x,+y,+z'

loop_
_atom_site_label
_atom_site_type_symbol
_atom_site_occupancy
_atom_site_fract_x
_atom_site_fract_y
_atom_site_fract_z
    C1    C  1.0000      0.1510    0.0000    0.0000
    C1    C  1.0000      0.8490    0.0000    0.0000
    C1    C  1.0000      0.0000    0.8490    0.0000
    C1    C  1.0000      0.0000    0.1510    0.0000
    C1    C  1.0000      0.1510    0.1510    0.0000
    C1    C  1.0000      0.8490    0.8490    0.0000
    C1    C  1.0000      0.4843    0.6667    0.5000
    C1    C  1.0000      0.1823    0.6667    0.5000
    C1    C  1.0000      0.3333    0.5157    0.5000
    C1    C  1.0000      0.3333    0.8177    0.5000
    C1    C  1.0000      0.4843    0.8177    0.5000
    C1    C  1.0000      0.1823    0.5157    0.5000
    C2    C  1.0000      0.2980    0.0000    0.0000
    C2    C  1.0000      0.7020    0.0000    0.0000
    C2    C  1.0000      0.0000    0.7020    0.0000
    C2    C  1.0000      0.0000    0.2980    0.0000
    C2    C  1.0000      0.2980    0.2980    0.0000
    C2    C  1.0000      0.7020    0.7020    0.0000
    C2    C  1.0000      0.6313    0.6667    0.5000
    C2    C  1.0000      0.0353    0.6667    0.5000
    C2    C  1.0000      0.3333    0.3687    0.5000
    C2    C  1.0000      0.3333    0.9647    0.5000
    C2    C  1.0000      0.6313    0.9647    0.5000
    C2    C  1.0000      0.0353    0.3687    0.5000
    C3    C  1.0000      0.4293    0.0000    0.0000
    C3    C  1.0000      0.5707    0.0000    0.0000
    C3    C  1.0000      0.0000    0.5707    0.0000
    C3    C  1.0000      0.0000    0.4293    0.0000
    C3    C  1.0000      0.4293    0.4293    0.0000
    C3    C  1.0000      0.5707    0.5707    0.0000
    C3    C  1.0000      0.7626    0.6667    0.5000
    C3    C  1.0000      0.9040    0.6667    0.5000
    C3    C  1.0000      0.3333    0.2374    0.5000
    C3    C  1.0000      0.3333    0.0960    0.5000
    C3    C  1.0000      0.7626    0.0960    0.5000
    C3    C  1.0000      0.9040    0.2374    0.5000
